# Supplementary material for: Development of a deep learning-based software for calculating cleansing score in small bowel capsule endoscopy
Source: PubMed Central journal article supplement (PMC7904767; doi:10.1038/s41598-021-81686-7), 2021-02-24

**Title:** Development of a deep learning-based software for calculating cleansing score in small bowel capsule endoscopy

Ji Hyung Nam, M.D., Ph.D.<sup>1†</sup>, Youngbae Hwang, Ph.D.<sup>2†</sup>, Dong Jun Oh, M.D.<sup>1</sup>, Junseok Park, M.D.<sup>3</sup>, Ki Bae Kim, M.D., Ph.D.<sup>4</sup>,  
Min Kyu Jung, M.D., Ph.D.<sup>5</sup>, and Yun Jeong Lim, M.D., Ph.D.<sup>1\*</sup>

<sup>1</sup>Division of Gastroenterology, Department of Internal Medicine, Dongguk University Ilsan Hospital, Dongguk University College of Medicine, Goyang, Republic of Korea

<sup>2</sup>Department of Electronics Engineering, Chungbuk National University, Republic of Korea

<sup>3</sup>Digestive Disease Center, Institute for Digestive Research, Department of Internal Medicine, Soonchunhyang University College of Medicine, Seoul, Republic of Korea

<sup>4</sup>Department of Internal Medicine, Chungbuk National University College of Medicine, Cheongju, Republic of Korea

<sup>5</sup>Division of Gastroenterology and Hepatology, Department of Internal Medicine, Kyungpook National University Hospital, Daegu, Republic of Korea

\*Correspondence: Yun Jeong Lim

†These authors contributed equally to this work.

**Supplementary Figure 1. Class Activation Map for recognition of small bowel cleansing scores by deep learning. Red and yellow colors are weighted parts in the recognition.**

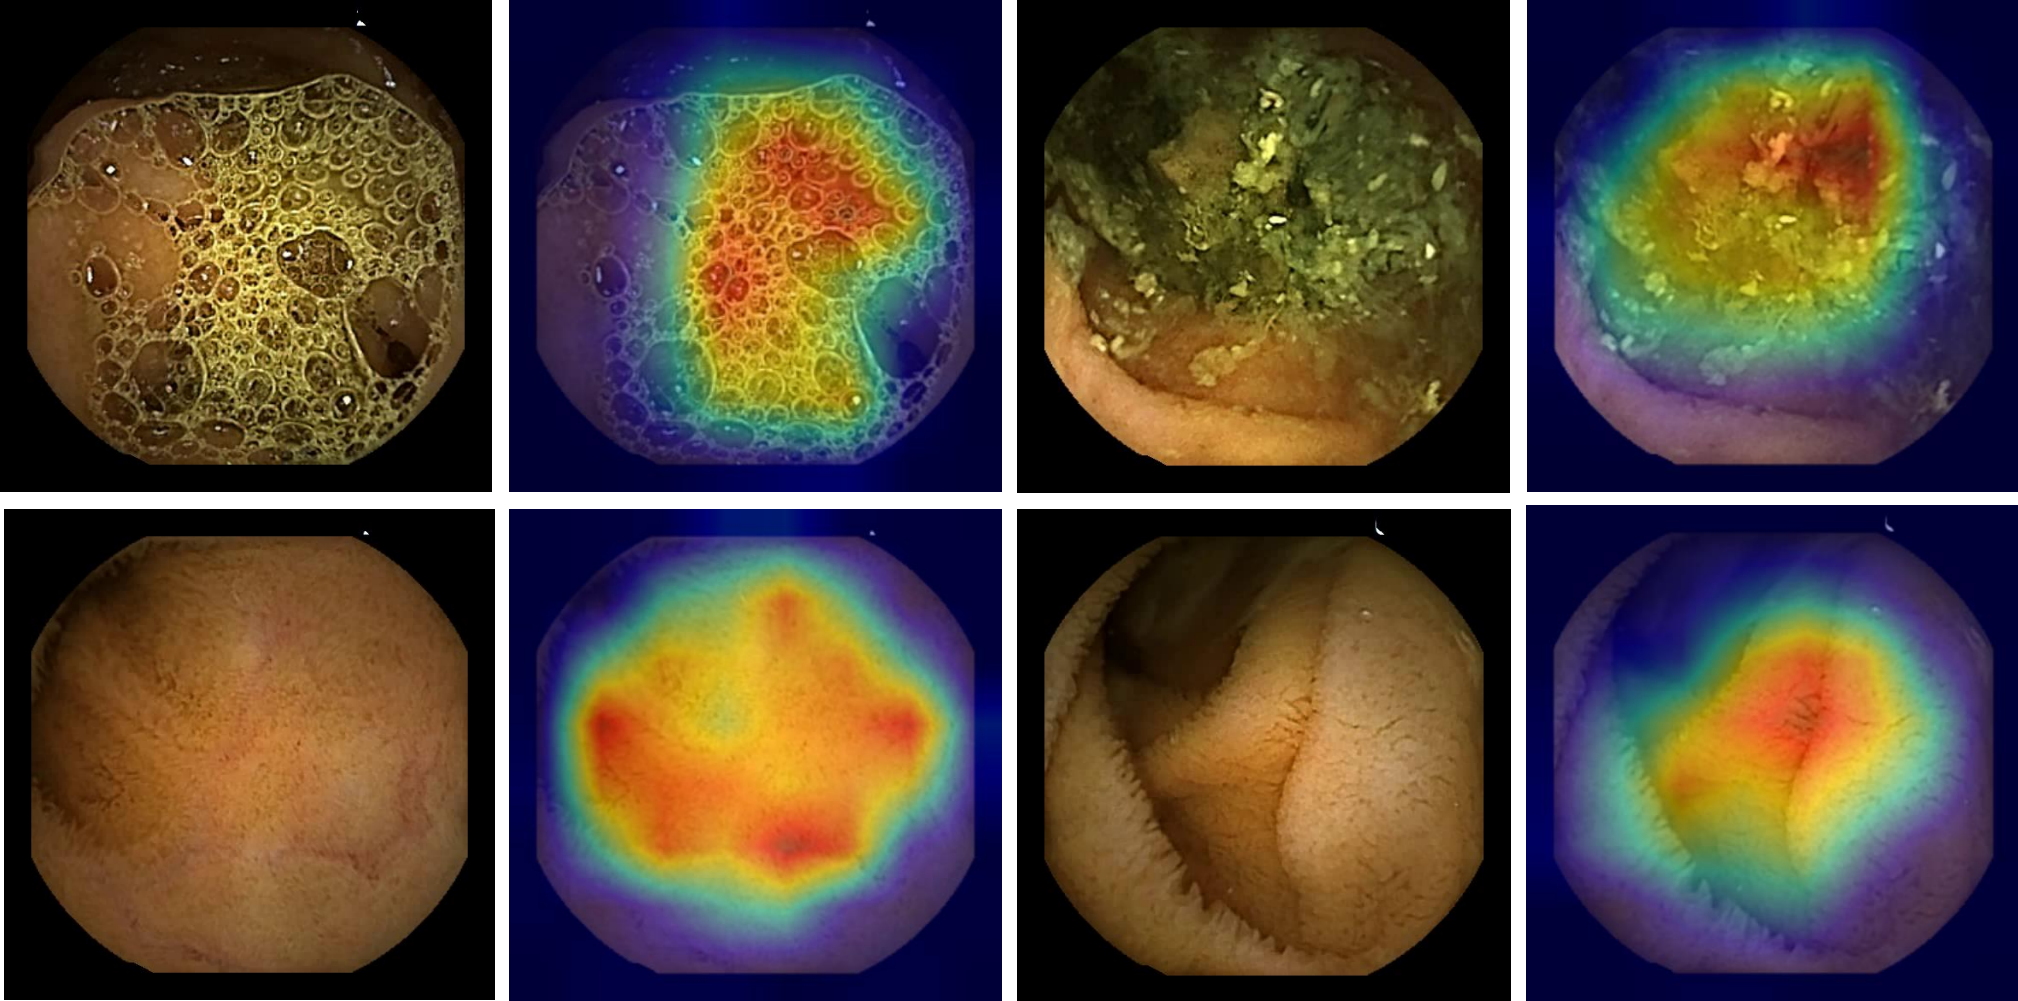

Supplement: 41598_2021_81686_MOESM1_ESM.pdf [file 41598_2021_81686_MOESM1_ESM.pdf]
